# Supplementary material
Source: PubMed Central journal article supplement (PMC10155109)
Supplement: NIHMS1853069-supplement-supplement.pdf [file NIHMS1853069-supplement-supplement.pdf]

|                                                                            | <b>NCH<br/>N=16,624</b> | <b>CCHMC<br/>N=19,464</b> |
|----------------------------------------------------------------------------|-------------------------|---------------------------|
| <b>Encounter age (years)</b>                                               | 6 [0-69]                | 7.4 [0.0-43.3]            |
| <b>Sex (male)</b>                                                          | 9,086 (55%)             | 11,001 (57%)              |
| <b>Diagnosis</b>                                                           |                         |                           |
| <b>Cerebral palsy (spastic quadriplegic, diplegic, other, unspecified)</b> | 3,964 (24%)             | 2563 (13%)                |
| <b>Feeding difficulties</b>                                                | 1,747 (11%)             | 1681 (8.6%)               |
| <b>Seizures</b>                                                            | 717 (4.3%)              | 1226 (6.3%)               |
| <b>Chromosomal abnormalities</b>                                           | 342 (2.1%)              | 779 (4.0%)                |
| <b>Diabetes</b>                                                            | 179 (1.1%)              | 108 (0.6%)                |
| <b>Mitochondrial disorders</b>                                             | 133 (0.8%)              | 161 (0.8%)                |

Data presented as median [min-max] or n (%)

**Suppl Table 1. Center Background Characteristics: 2010-2019**

| <b>Diagnosis</b>                                                           | <b>ICD-10 code</b> | <b>ICD-9 code</b> |
|----------------------------------------------------------------------------|--------------------|-------------------|
| <b>Cerebral palsy (spastic quadriplegic, diplegic, other, unspecified)</b> | G80.0              | 343.9             |
|                                                                            | G80.8              | 343.8             |
|                                                                            | G80.9              | 333.71            |
|                                                                            | G80.1              |                   |
|                                                                            | G80.3              |                   |
|                                                                            | G80.2              |                   |
|                                                                            | G80.4              |                   |
| <b>Feeding difficulties</b>                                                | R63.3              | 783.3             |
|                                                                            | F98.29             |                   |
| <b>Seizures</b>                                                            | G40.209            | 345.4             |
|                                                                            | G40.109            | 345.5             |
|                                                                            | G40.219            | 345.8             |
|                                                                            | G40.89             | 345.41            |
|                                                                            | G40.119            | 345.51            |
|                                                                            | G40.009            | 780.33            |
|                                                                            | G40.211            |                   |
|                                                                            | G40.019            |                   |
|                                                                            | G40.201            |                   |
|                                                                            | G40.111            |                   |
|                                                                            | F44.5              |                   |
|                                                                            | G40.011            |                   |
|                                                                            | G40.001            |                   |
|                                                                            | G40.101            |                   |
|                                                                            | G40.501            |                   |
| <b>Chromosomal abnormalities</b>                                           | Q99.9              | 758.9             |
|                                                                            | Q99.8              | 758.89            |
|                                                                            | Q93.5              | 758.81            |
|                                                                            | Q93.3              |                   |
|                                                                            | Q93.4              |                   |
|                                                                            | Q93.59             |                   |
|                                                                            | Q99.2              |                   |
|                                                                            | Q93.2              |                   |

|                                |         |        |
|--------------------------------|---------|--------|
| <b>Diabetes</b>                | E11.9   | 253.5  |
|                                | E10.65  | 250    |
|                                | E10.9   | 250.01 |
|                                | E11.40  | 250.13 |
|                                | E10.8   | 250.4  |
|                                | E11.8   | 250.03 |
|                                | E10.29  |        |
|                                | E11.65  |        |
|                                | E11.649 |        |
|                                | E10.620 |        |
|                                | Z13.1   |        |
|                                | Z83.3   |        |
|                                | R73.03  |        |
|                                | E10.339 |        |
| E08.9                          |         |        |
| <b>Mitochondrial disorders</b> | E88.40  | 277.87 |
|                                | E88.49  |        |
|                                | G71.3   |        |

Suppl Table 2. ICD codes for diagnoses

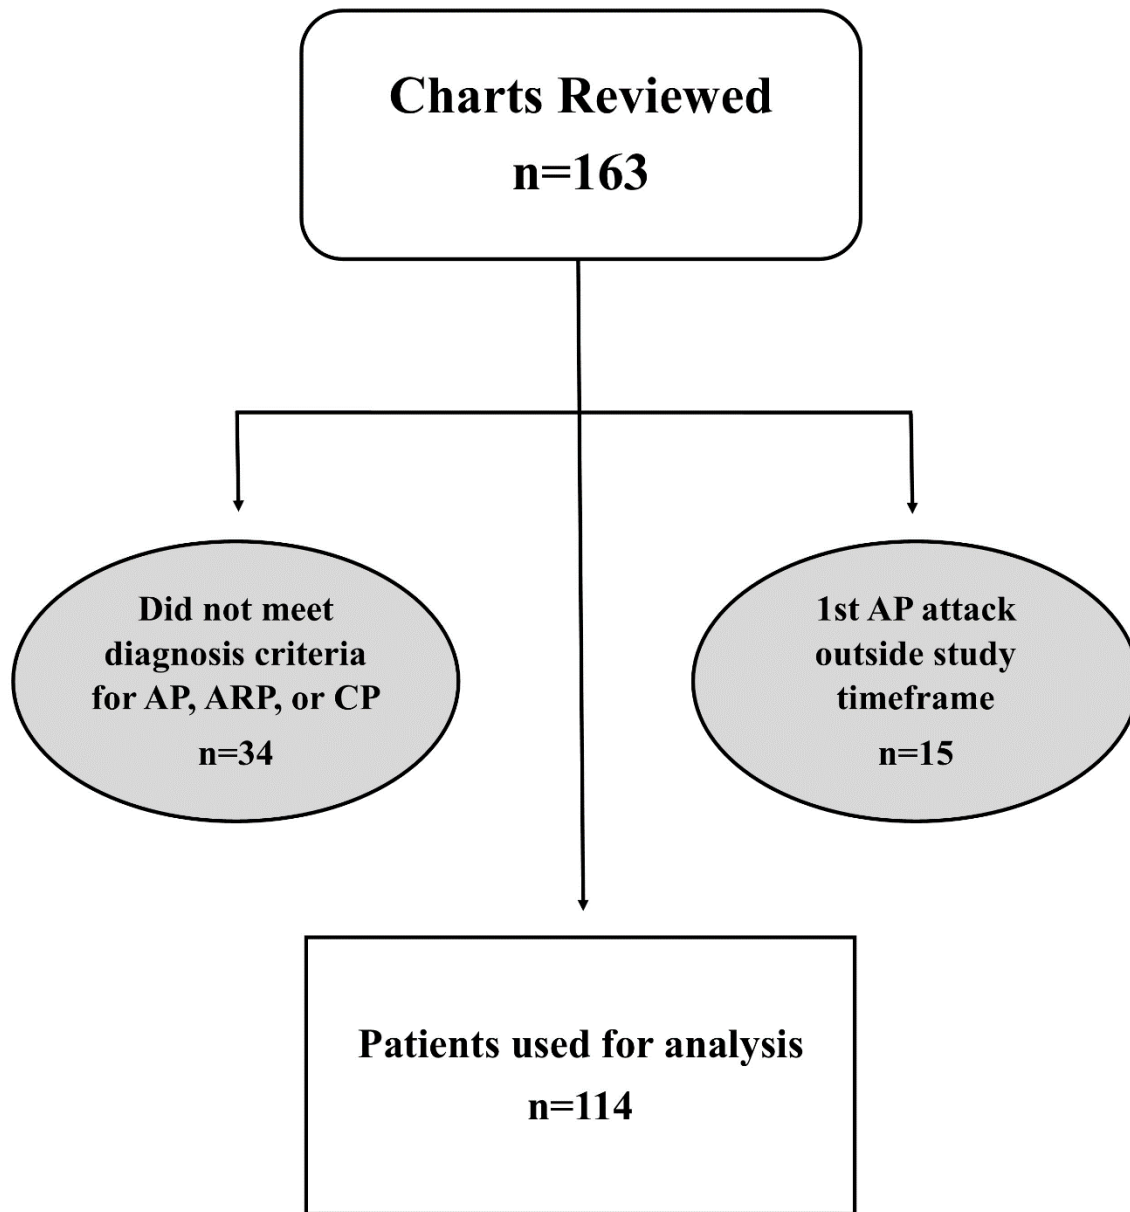

**Suppl Figure 1.** Number of patient charts reviewed
